# Supplementary material
Source: publisher figshare collection journal article supplement (https://tandf.figshare.com/ndownloader/files/22460795)
Supplement: Supplementary file 1 [file 22460795]

**Supporting Information**

**Polymer-Stabilized Cholesteric Liquid-Crystals as Tunable Light-Reflector with Low Operating-Voltage and Energy Consumption**

Qiang Zhanga,b, Xinming Zhanga,b, Le Yanga,c, Miao Xua, Jun Zhua, Guobing Zhanga,b, Yunsheng Dingb, Longzhen Qiua,b, Hongbo Lua,b,*

*a National Engineering Laboratory of Special Display Technology, State Key Laboratory of Advanced Display Technology, Special Display and Imaging Technology Innovation Center of Anhui Province, Academy of Opto-Electronic Technology, Hefei University of Technology, Hefei 230009, China.*

*b Anhui Province Key Laboratory of Advanced Functional Materials and Devices, School of Chemistry and Chemical Engineering, Hefei University of Technology, Hefei 230009, China.*

*c School of Electronic Science & Applied Physics, Hefei University of Technology, Hefei 230009, China.*

**Corresponding Authors E-mail:* [*bozhilu@hfut.edu.cn*](mailto:bozhilu@hfut.edu.cn)

**Contents**:

1. Schematic diagram of formation process of the PSCLC cell, the microscopy images of the textures observed under POM and the transmission spectra before and after electrical treatment................................................................................................................................Page 3

2. The optical micrographs under various DC voltages.............................................................Page 3

3. A plot of the reflection bandwidth versus the relaxation time...............................................Page 4

4. The SEM micrographs of the polymer network.....................................................................Page 4

5. The charging currents under the various applied DC voltages..............................................Page 4

6. Experimental dependence of the charging current on the charging time and its double-parameter (red solid curve) fitting...............................................................................................................Page5

7. Comparison of charging currents before and after polymerization........................................Page 5

8. The total current through sample **S1** at *U* = 0.2 V and 5.0 V................................................Page 4


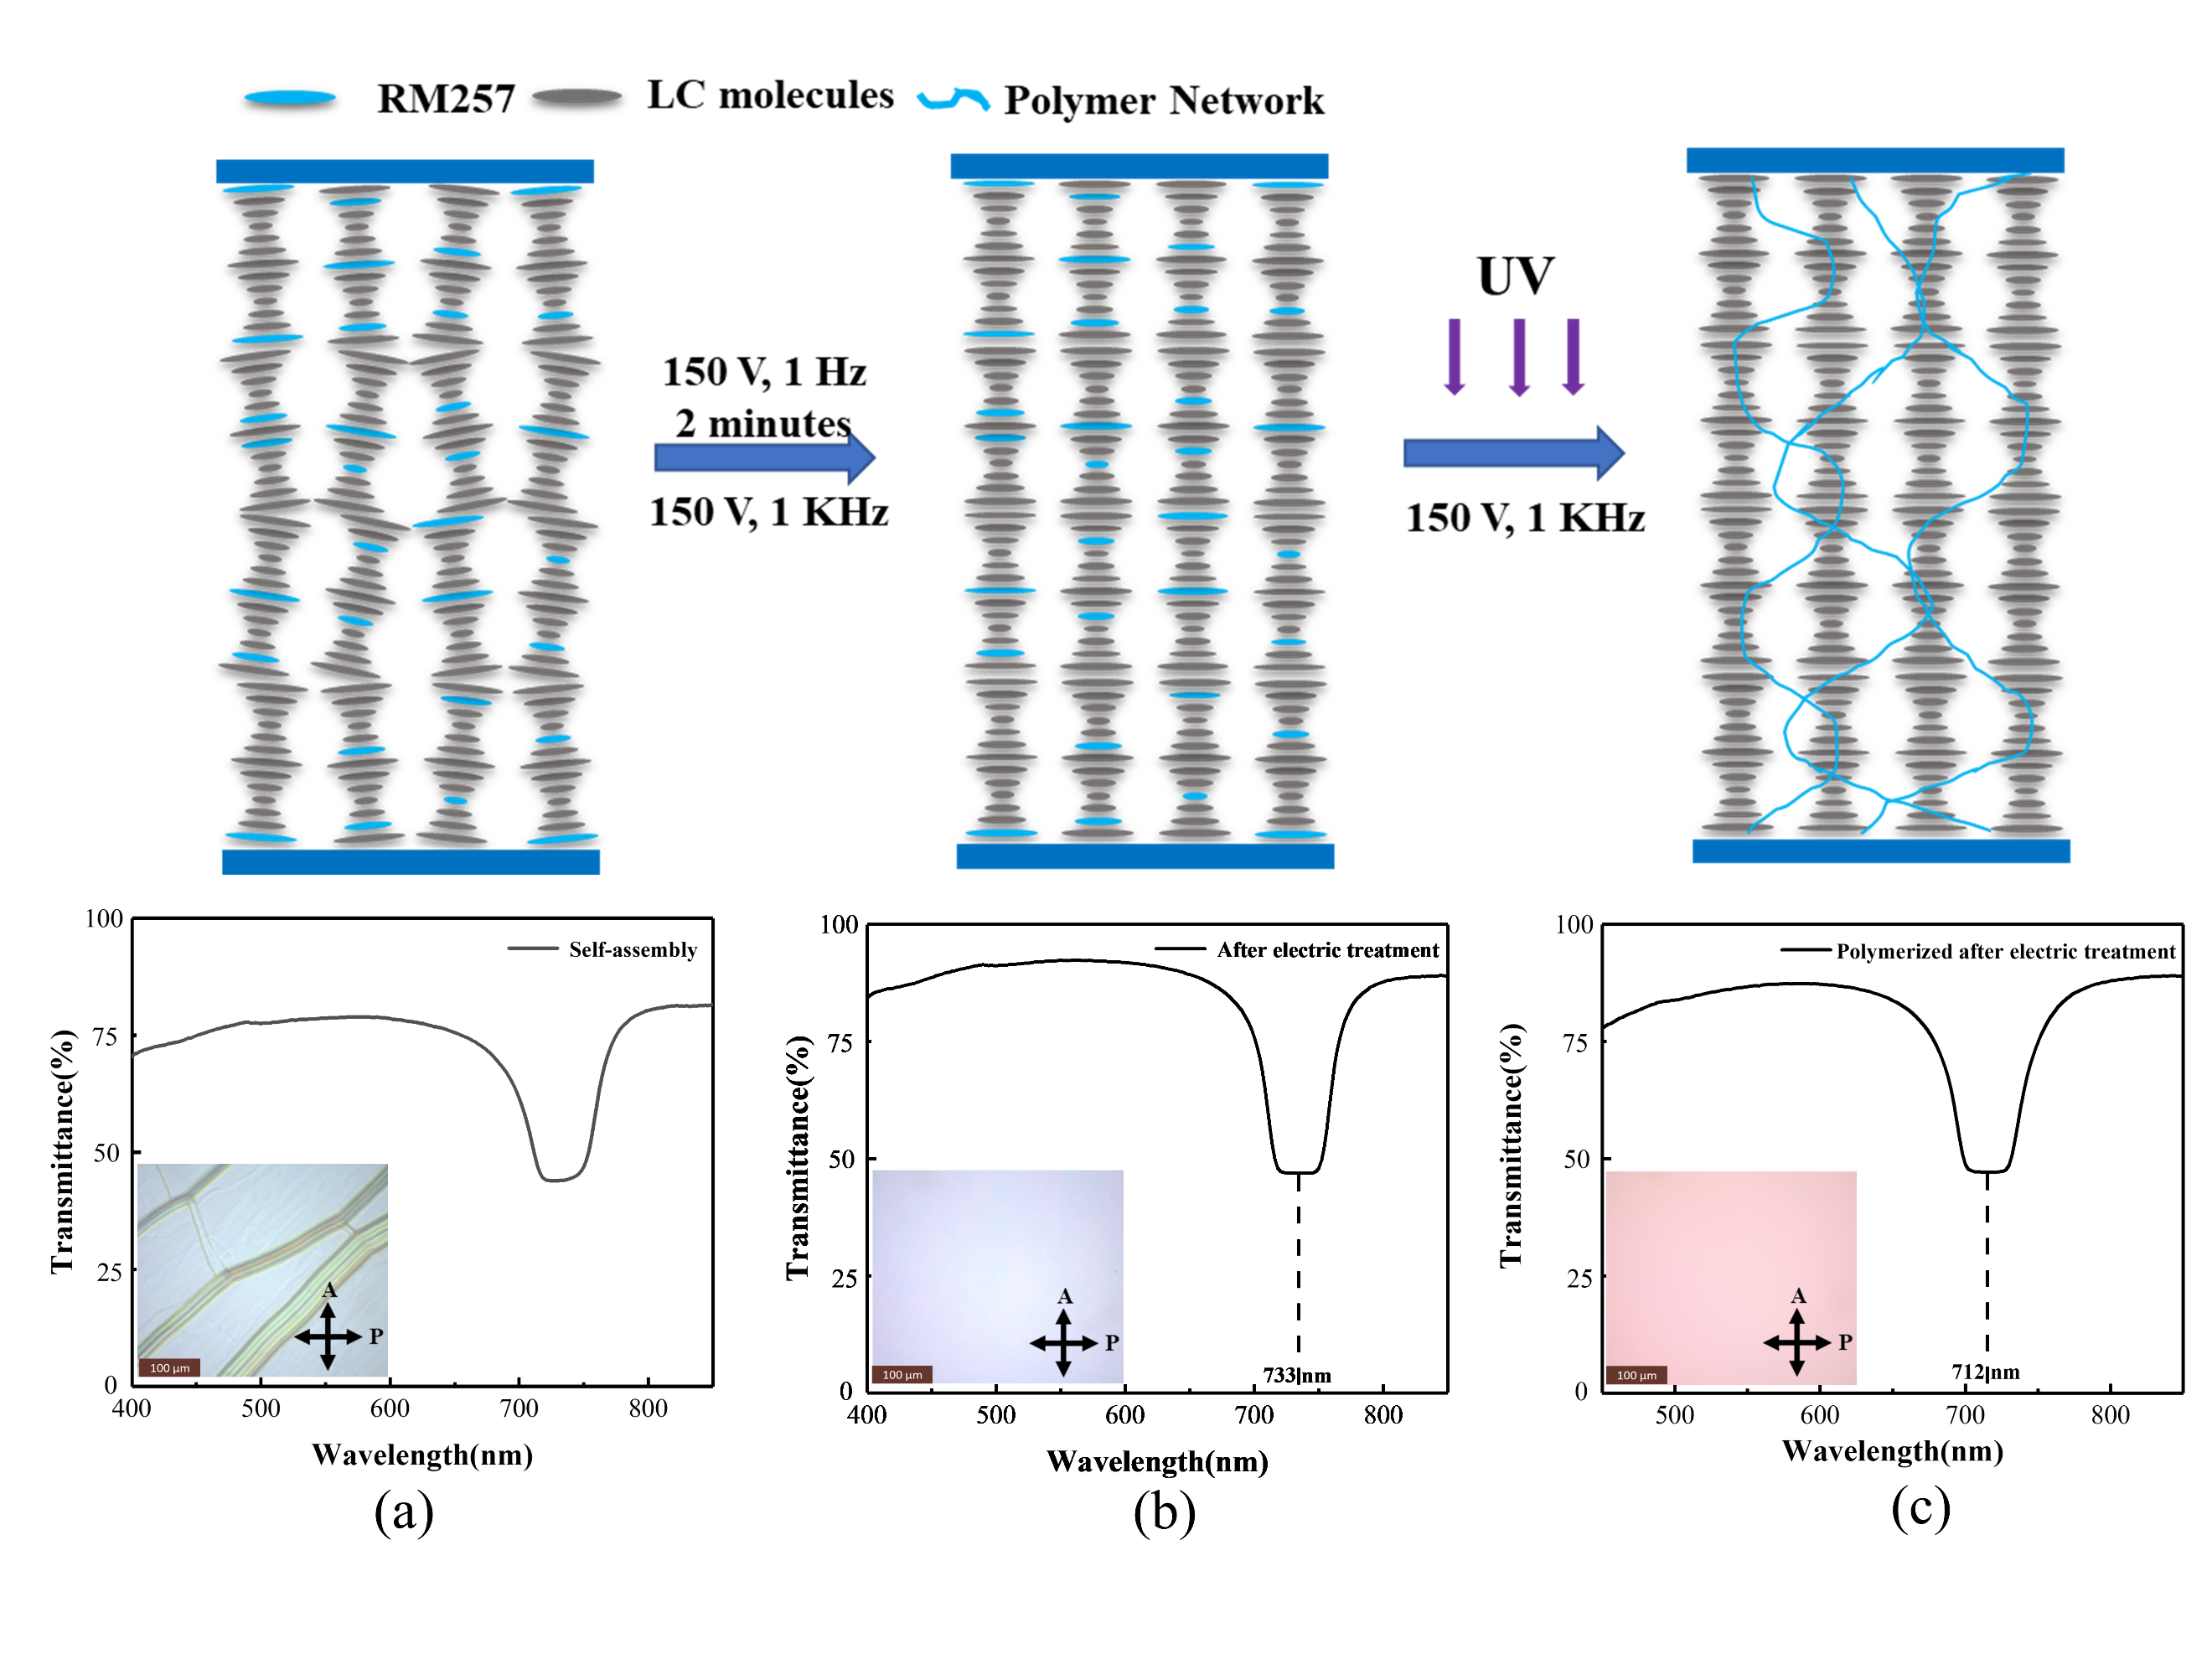


Figure. S1 Schematic diagram of formation process of the PSCLC cell, the microscopy images of the textures observed under POM and the transmission spectra before and after electrical treatment;


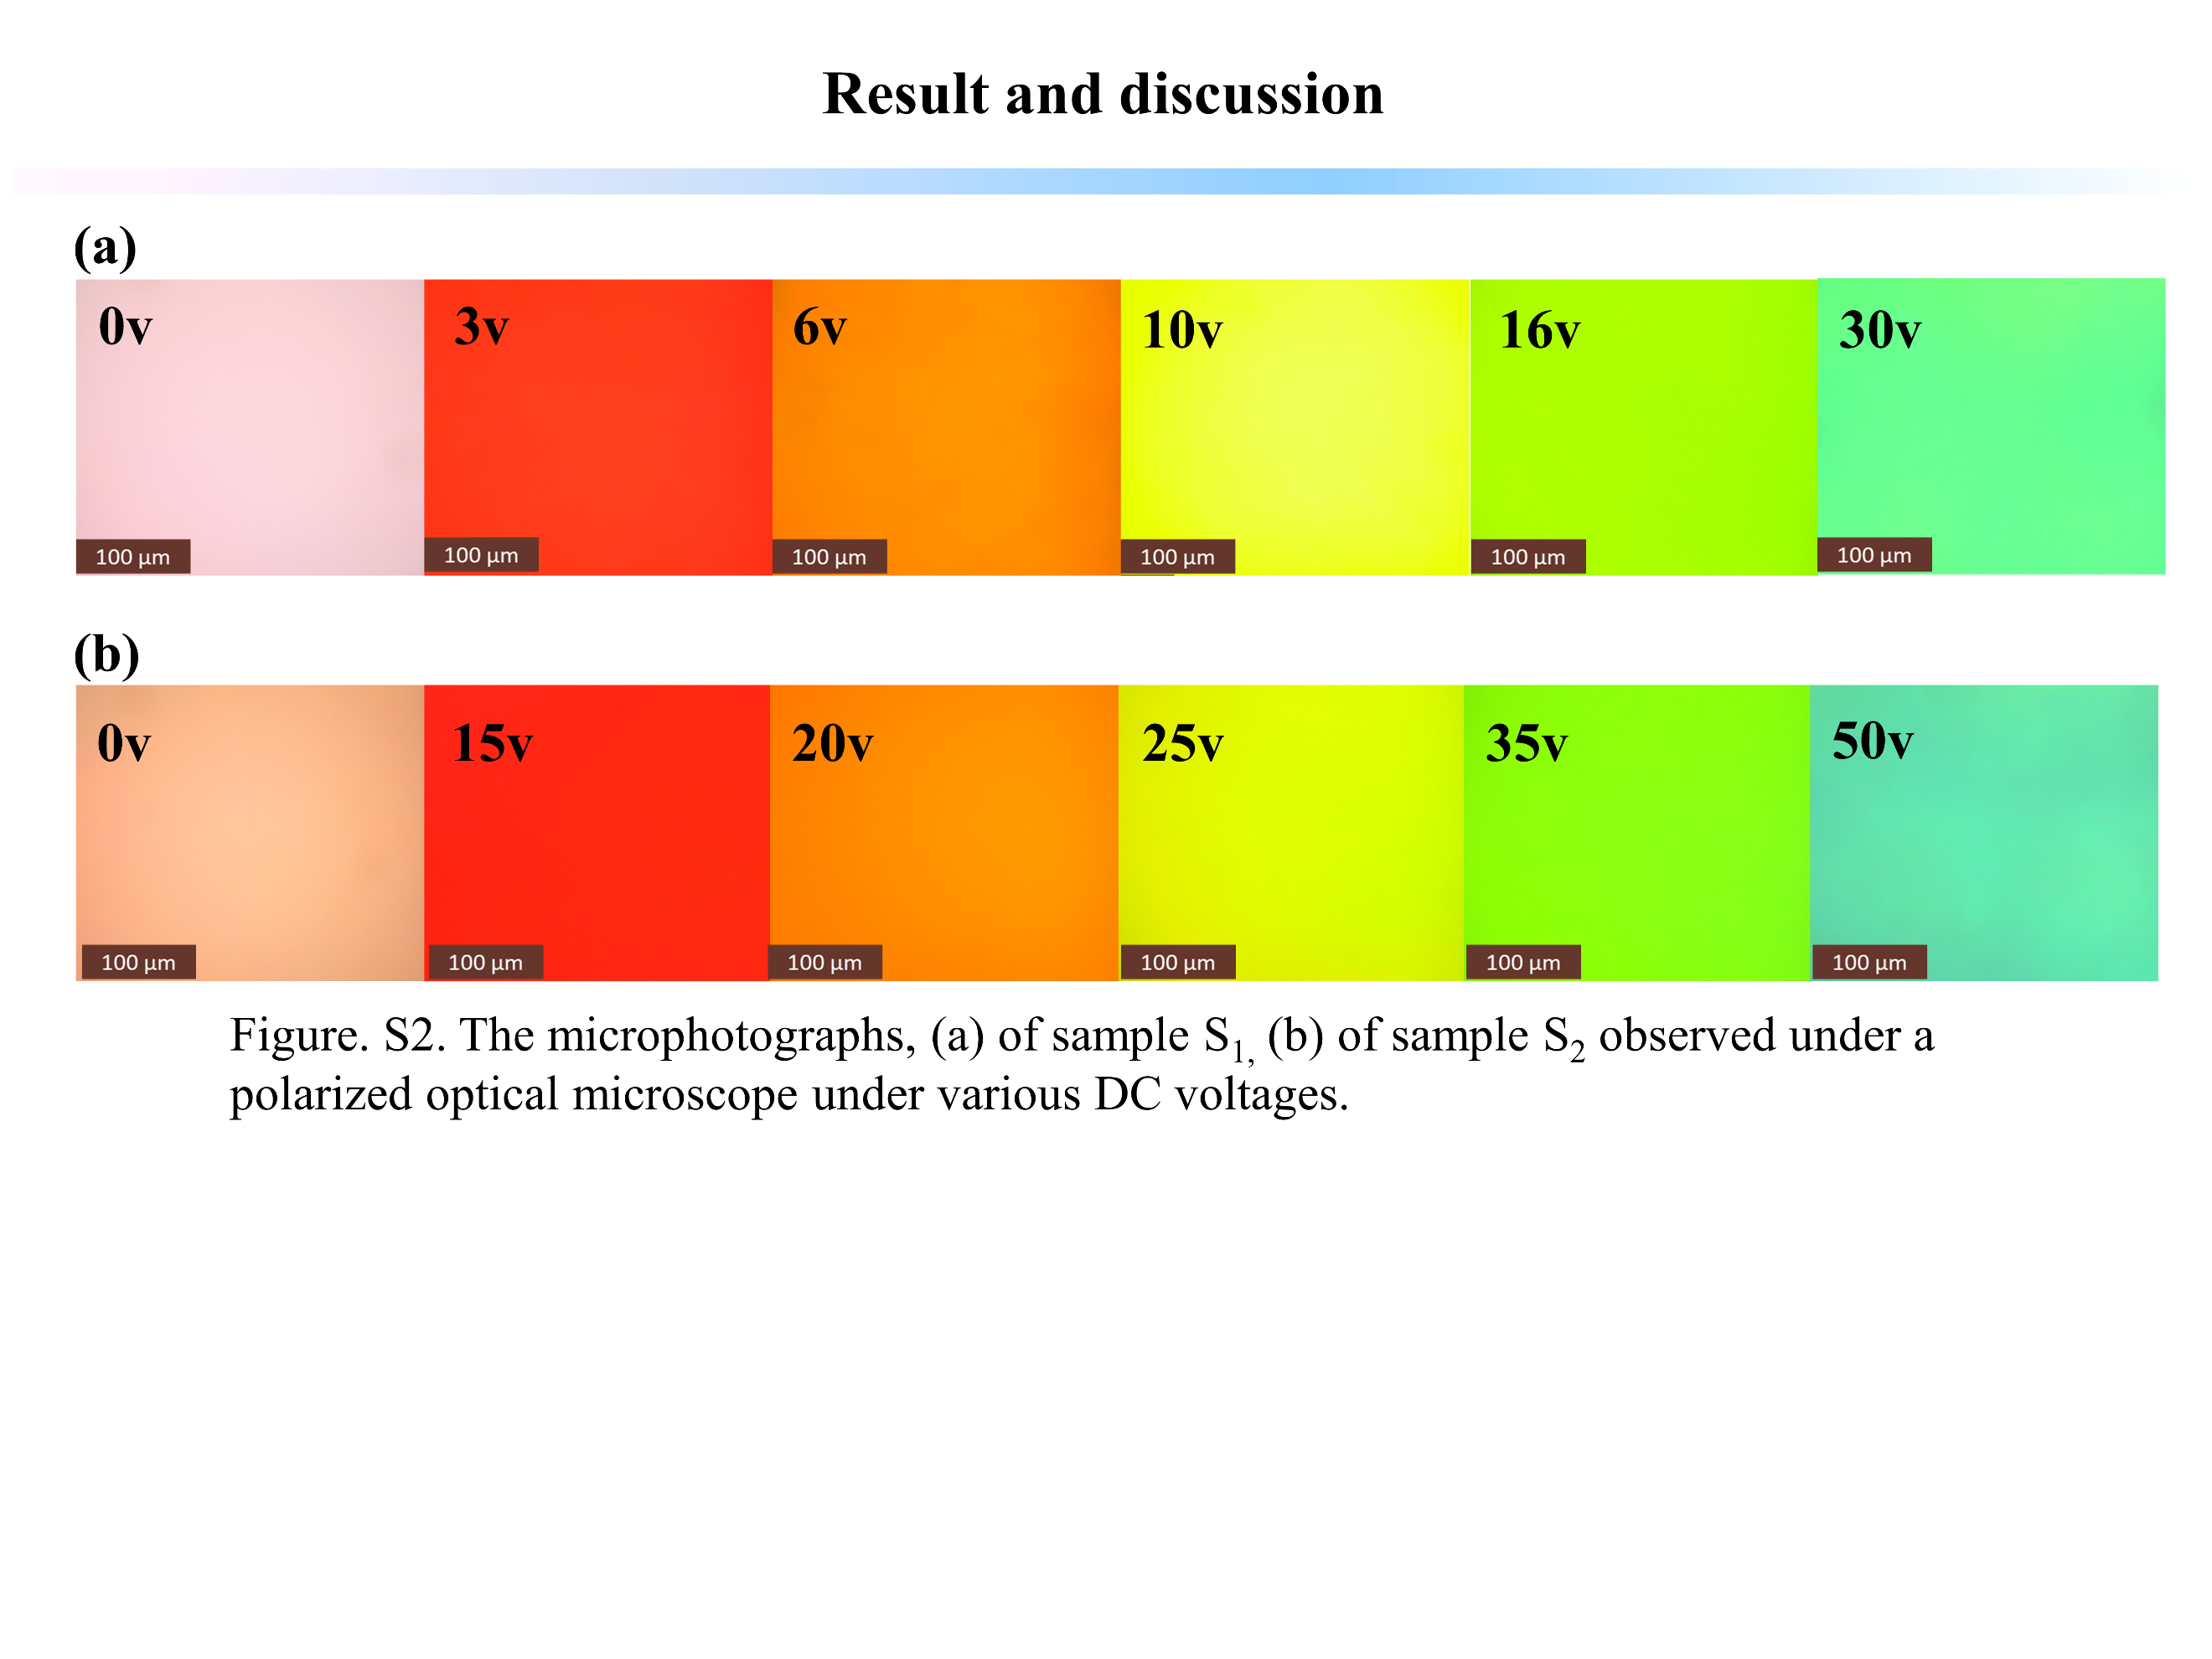


Figure. S2. The micrographs, (a) of sample **S1**,(b) of sample **S2** were observed under the reflection mode of optical microscopy under various DC voltages.


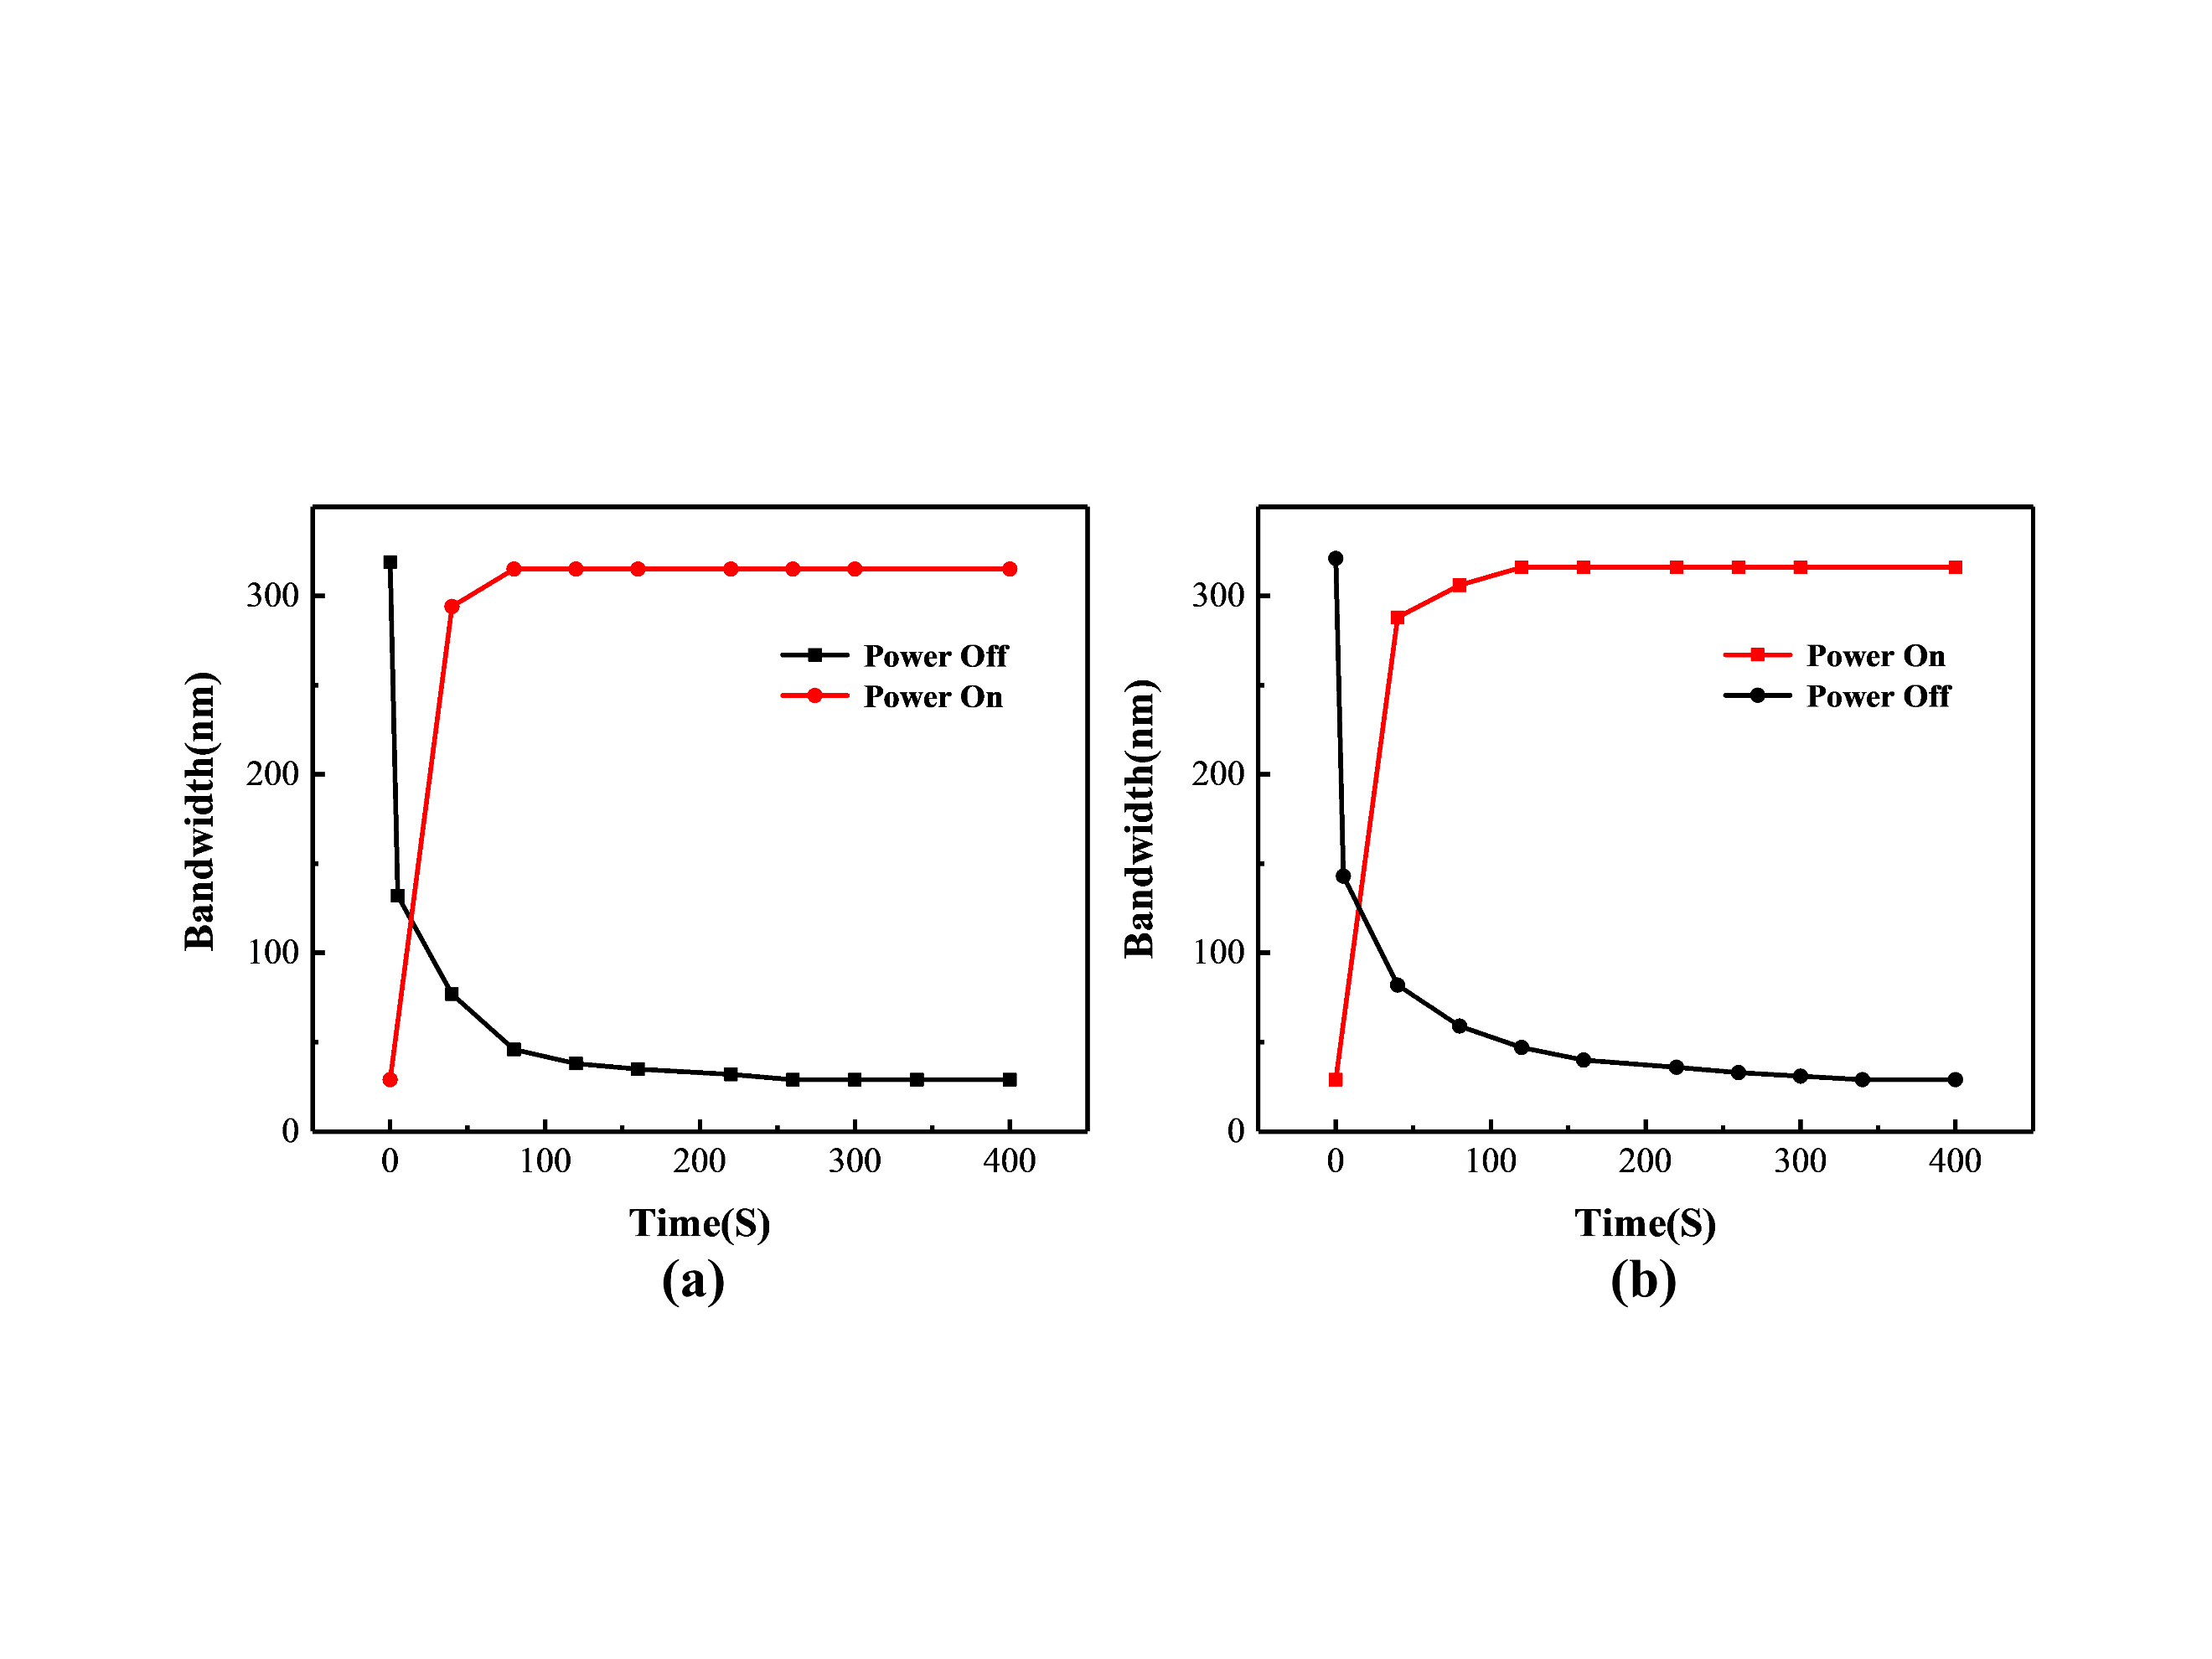


Figure. S3 A plot of the reflection bandwidth (nm) versus the relaxation time (s), (a) of sample **S1**, and (b) of sample **S2**.


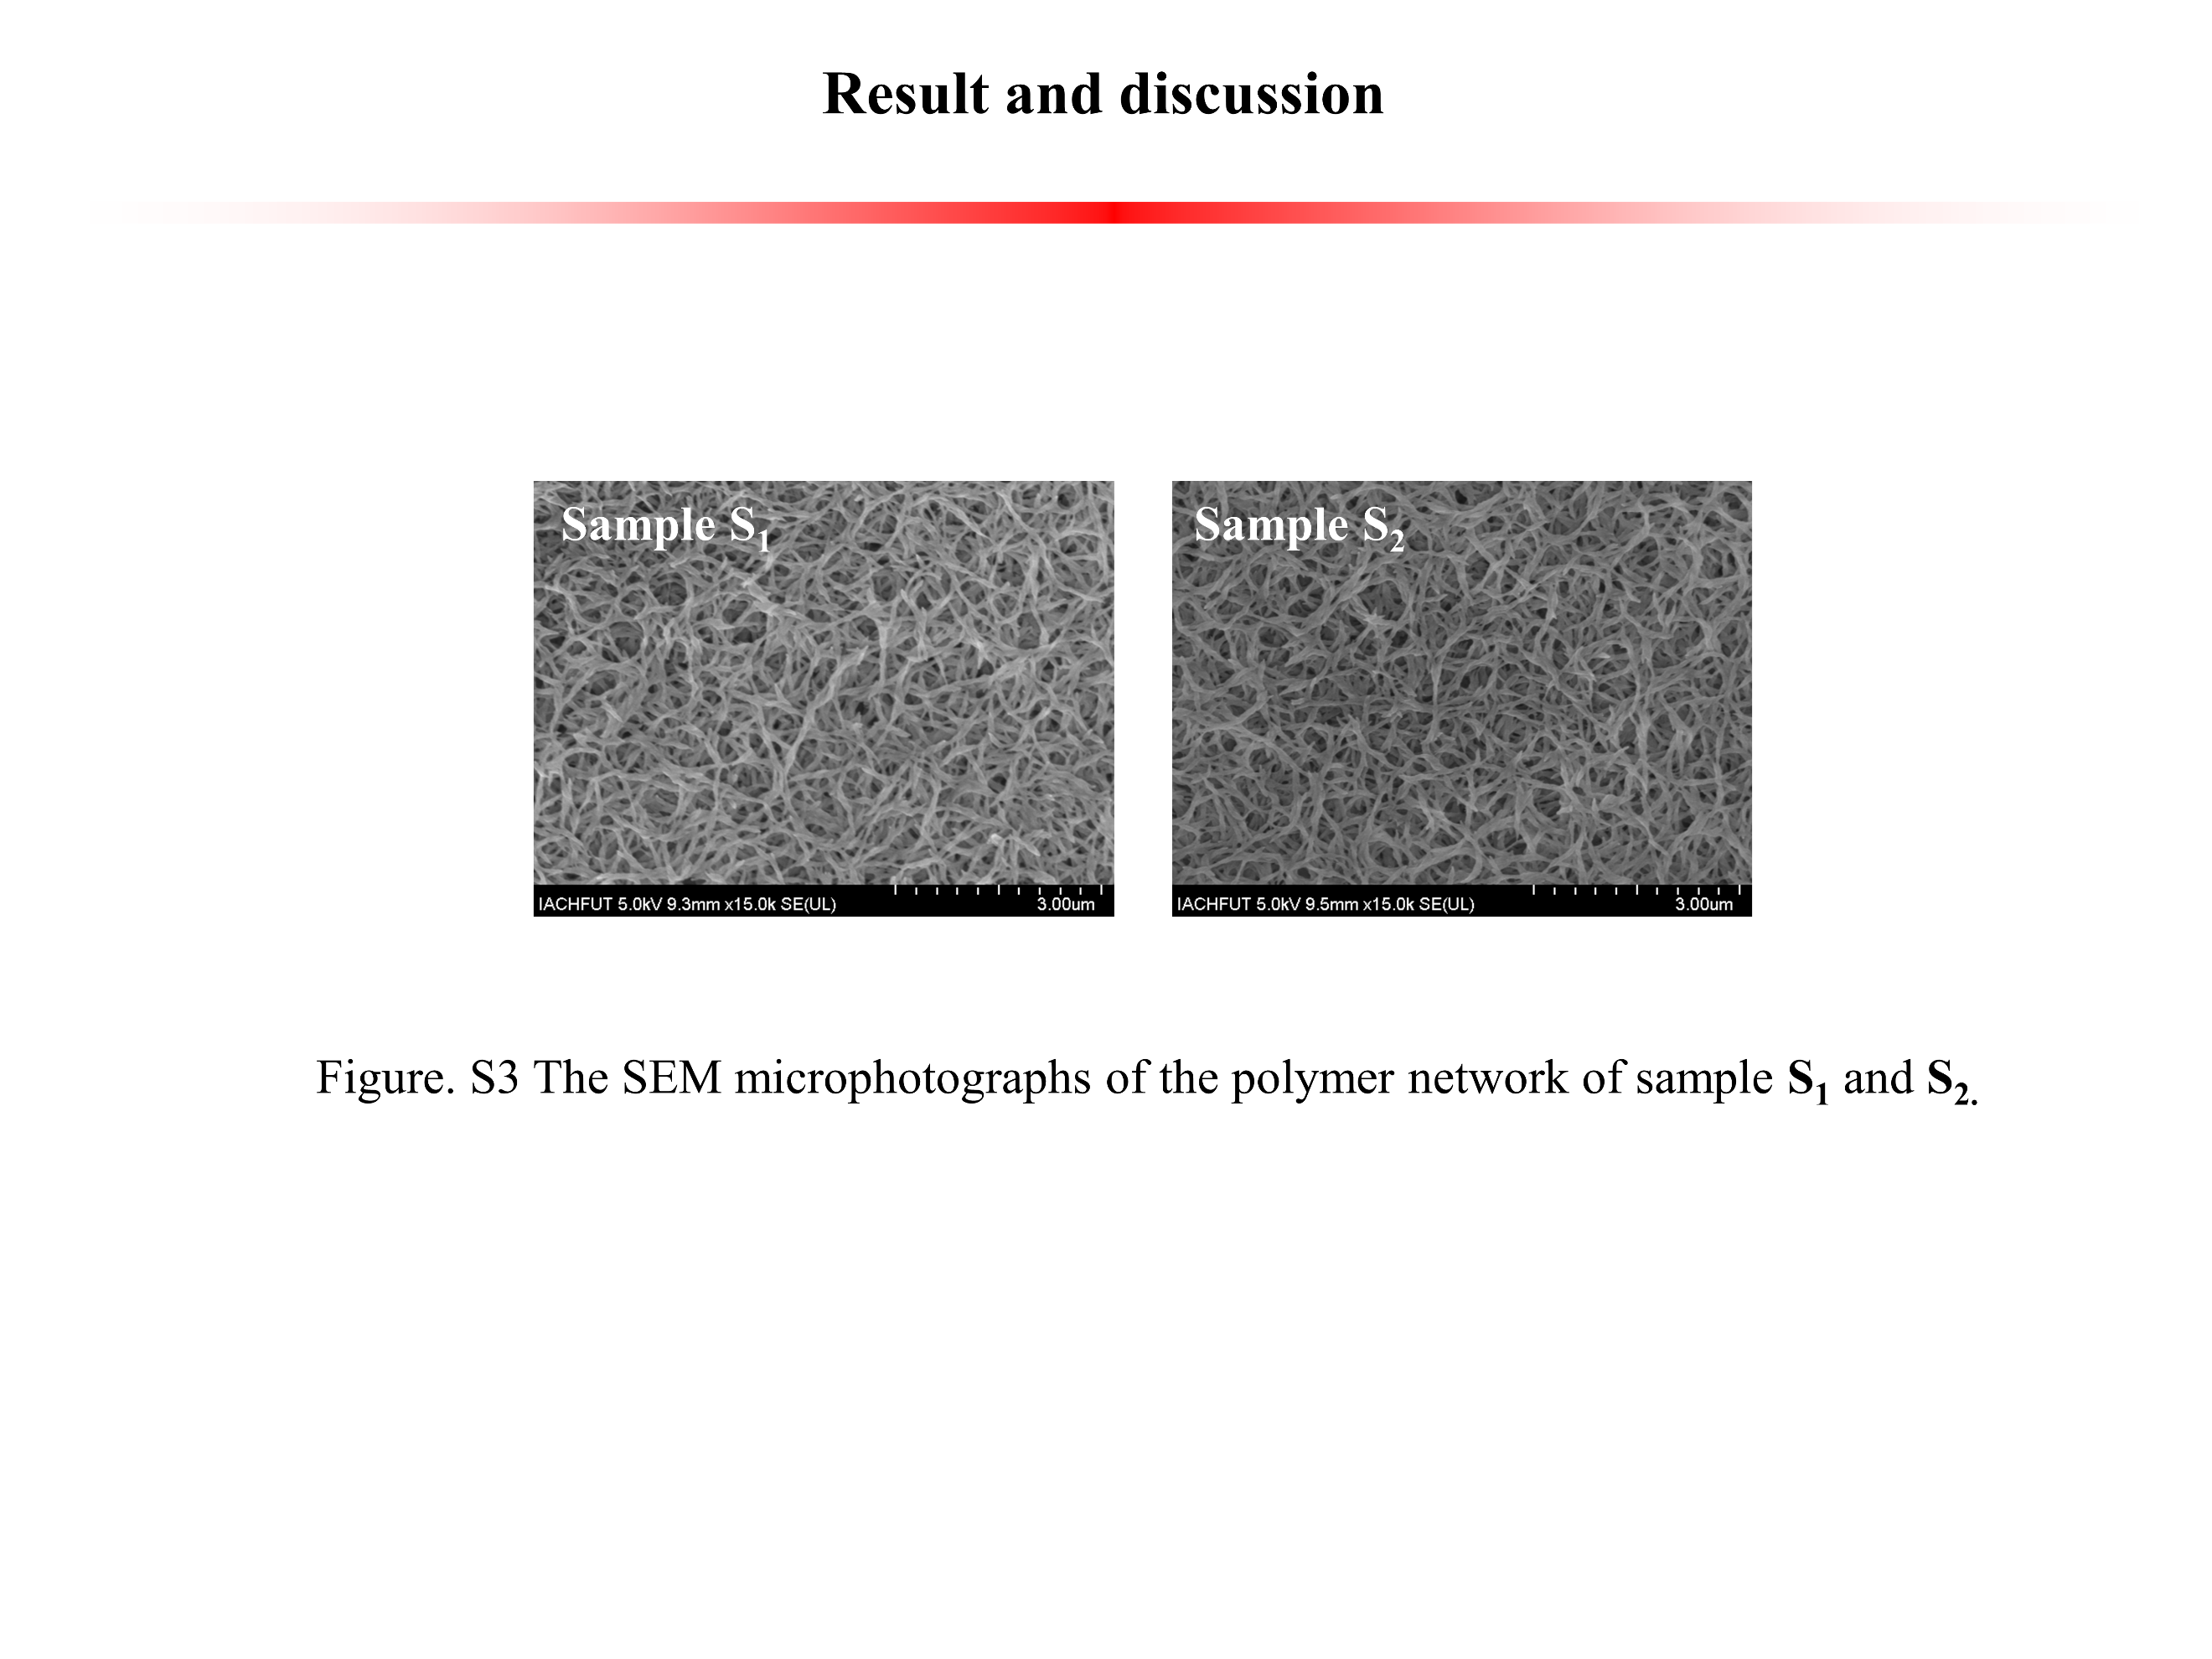


Figure. S4 The SEM micrographs of the polymer network of sample **S1** and **S2**.


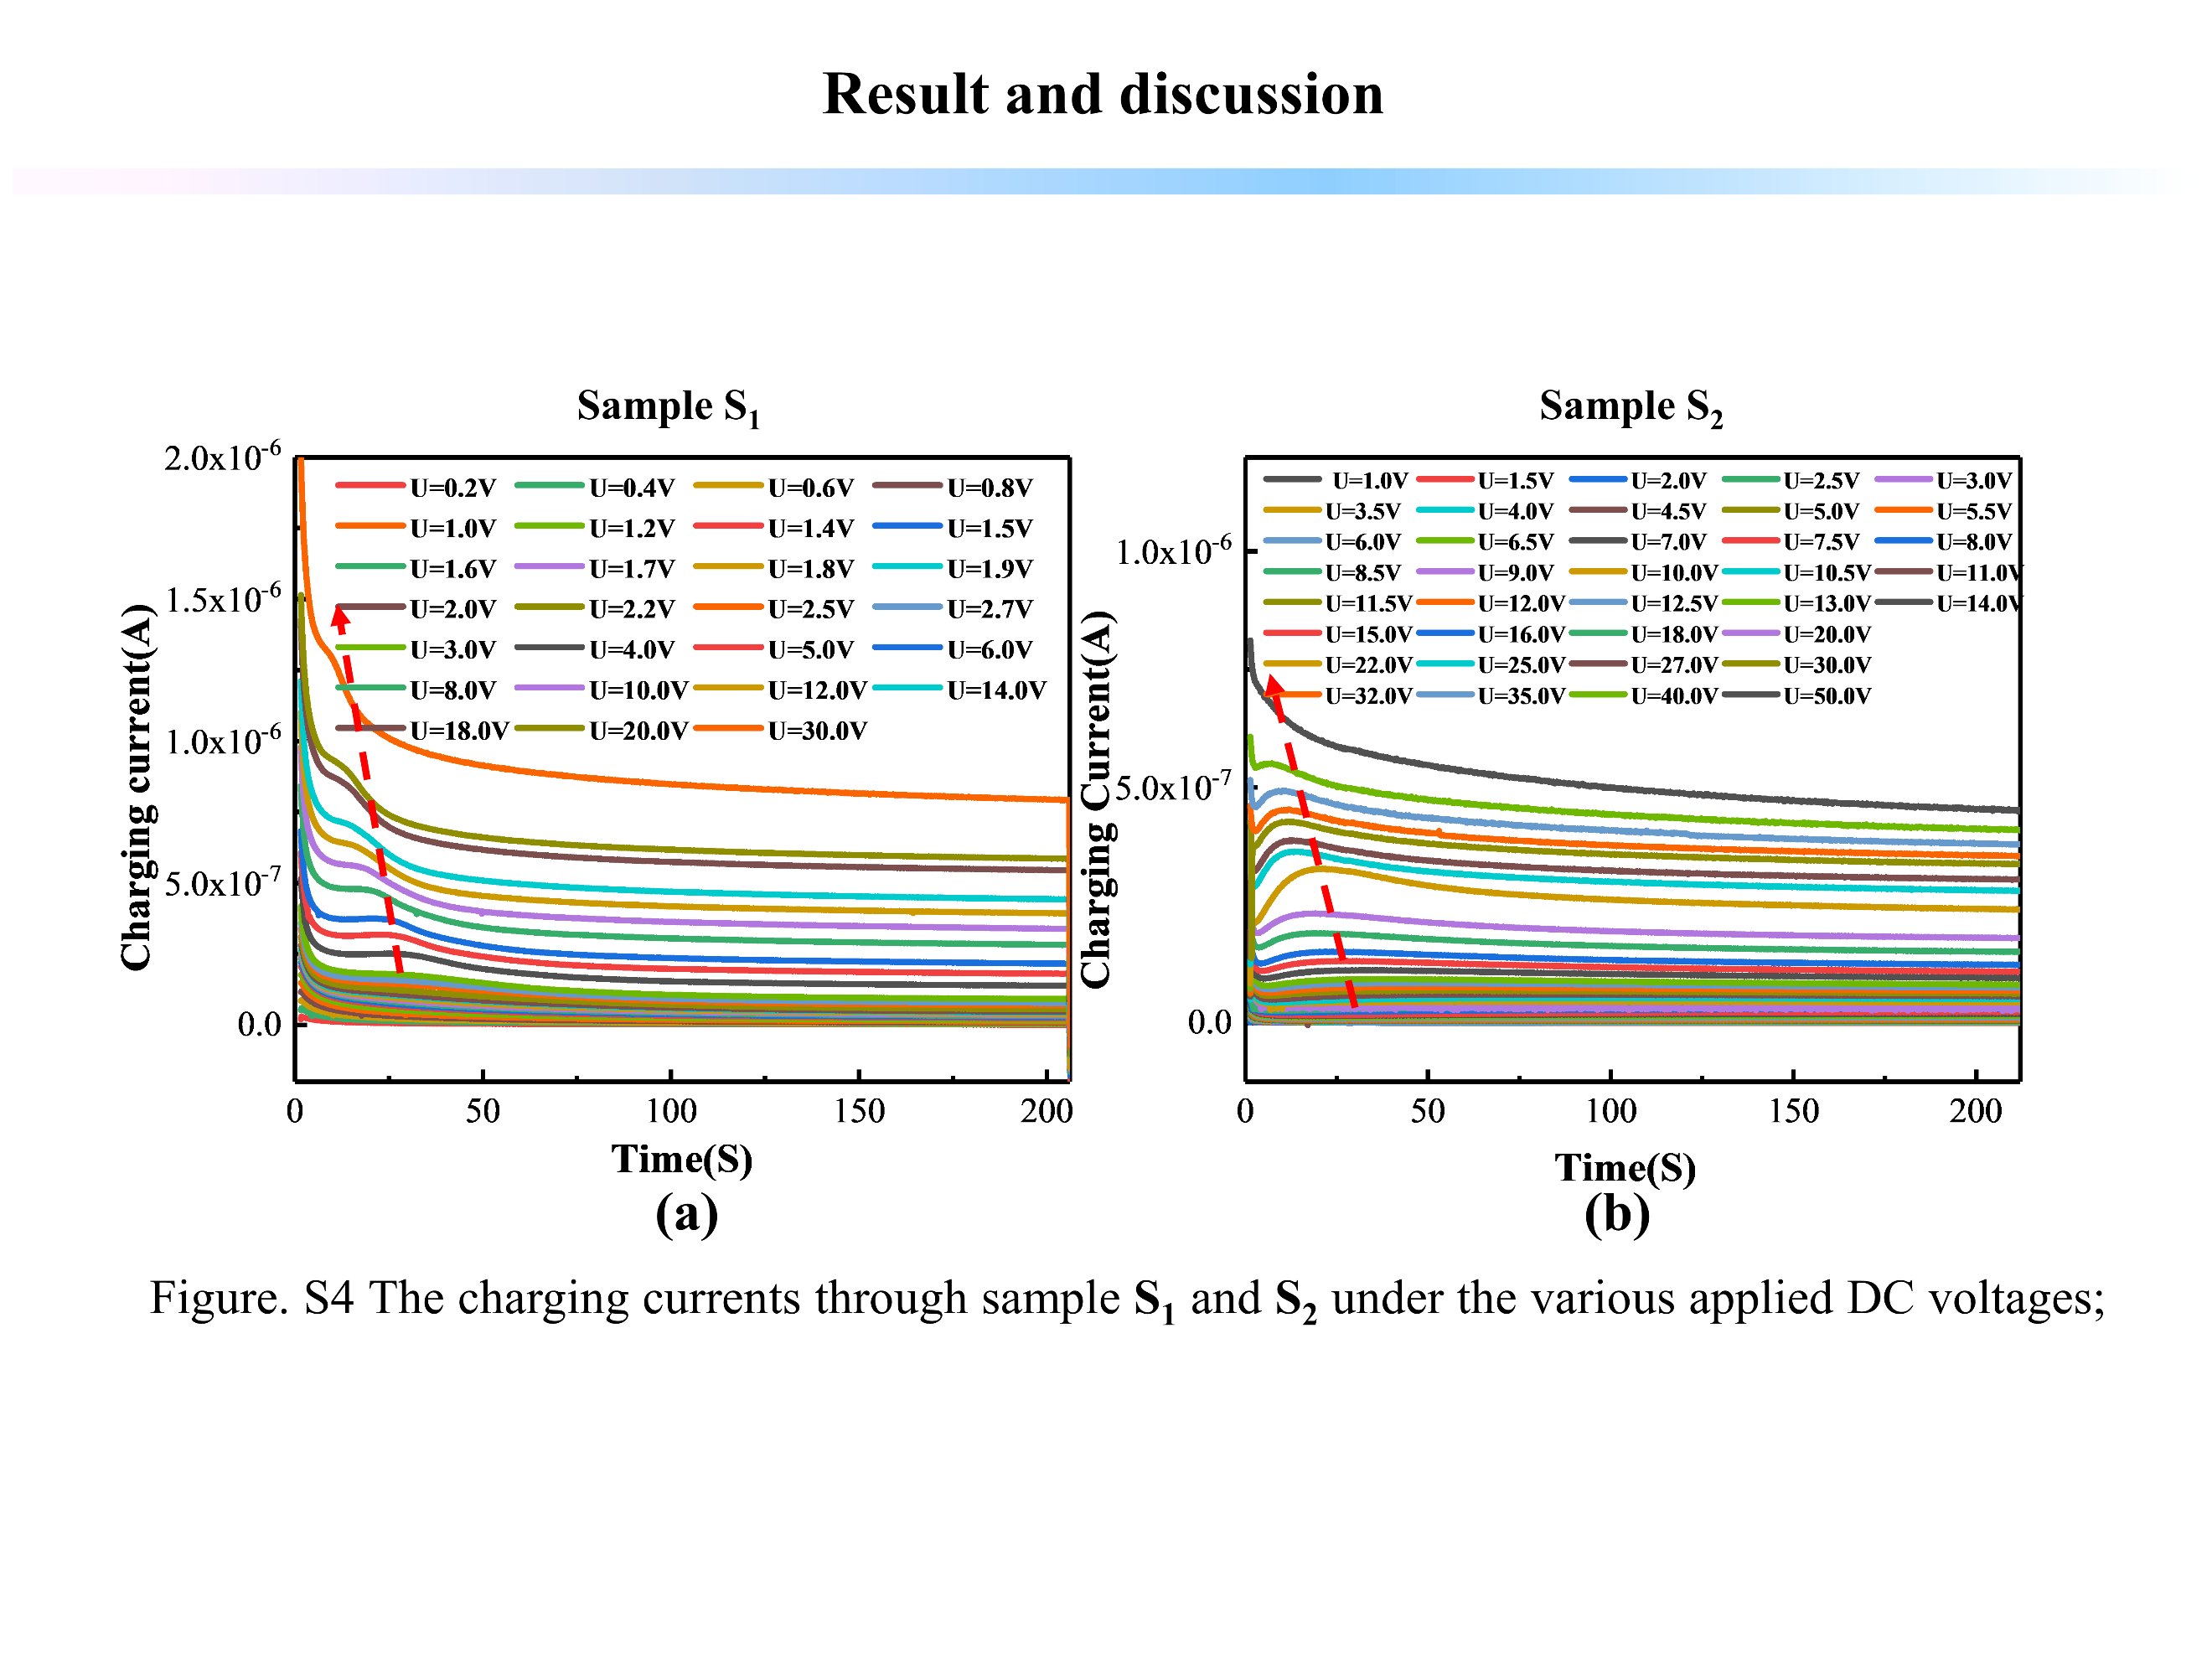


Figure. S5 The charging currents through (a) of sample **S1**, and (b) of sample **S2** under the various applied DC voltages;


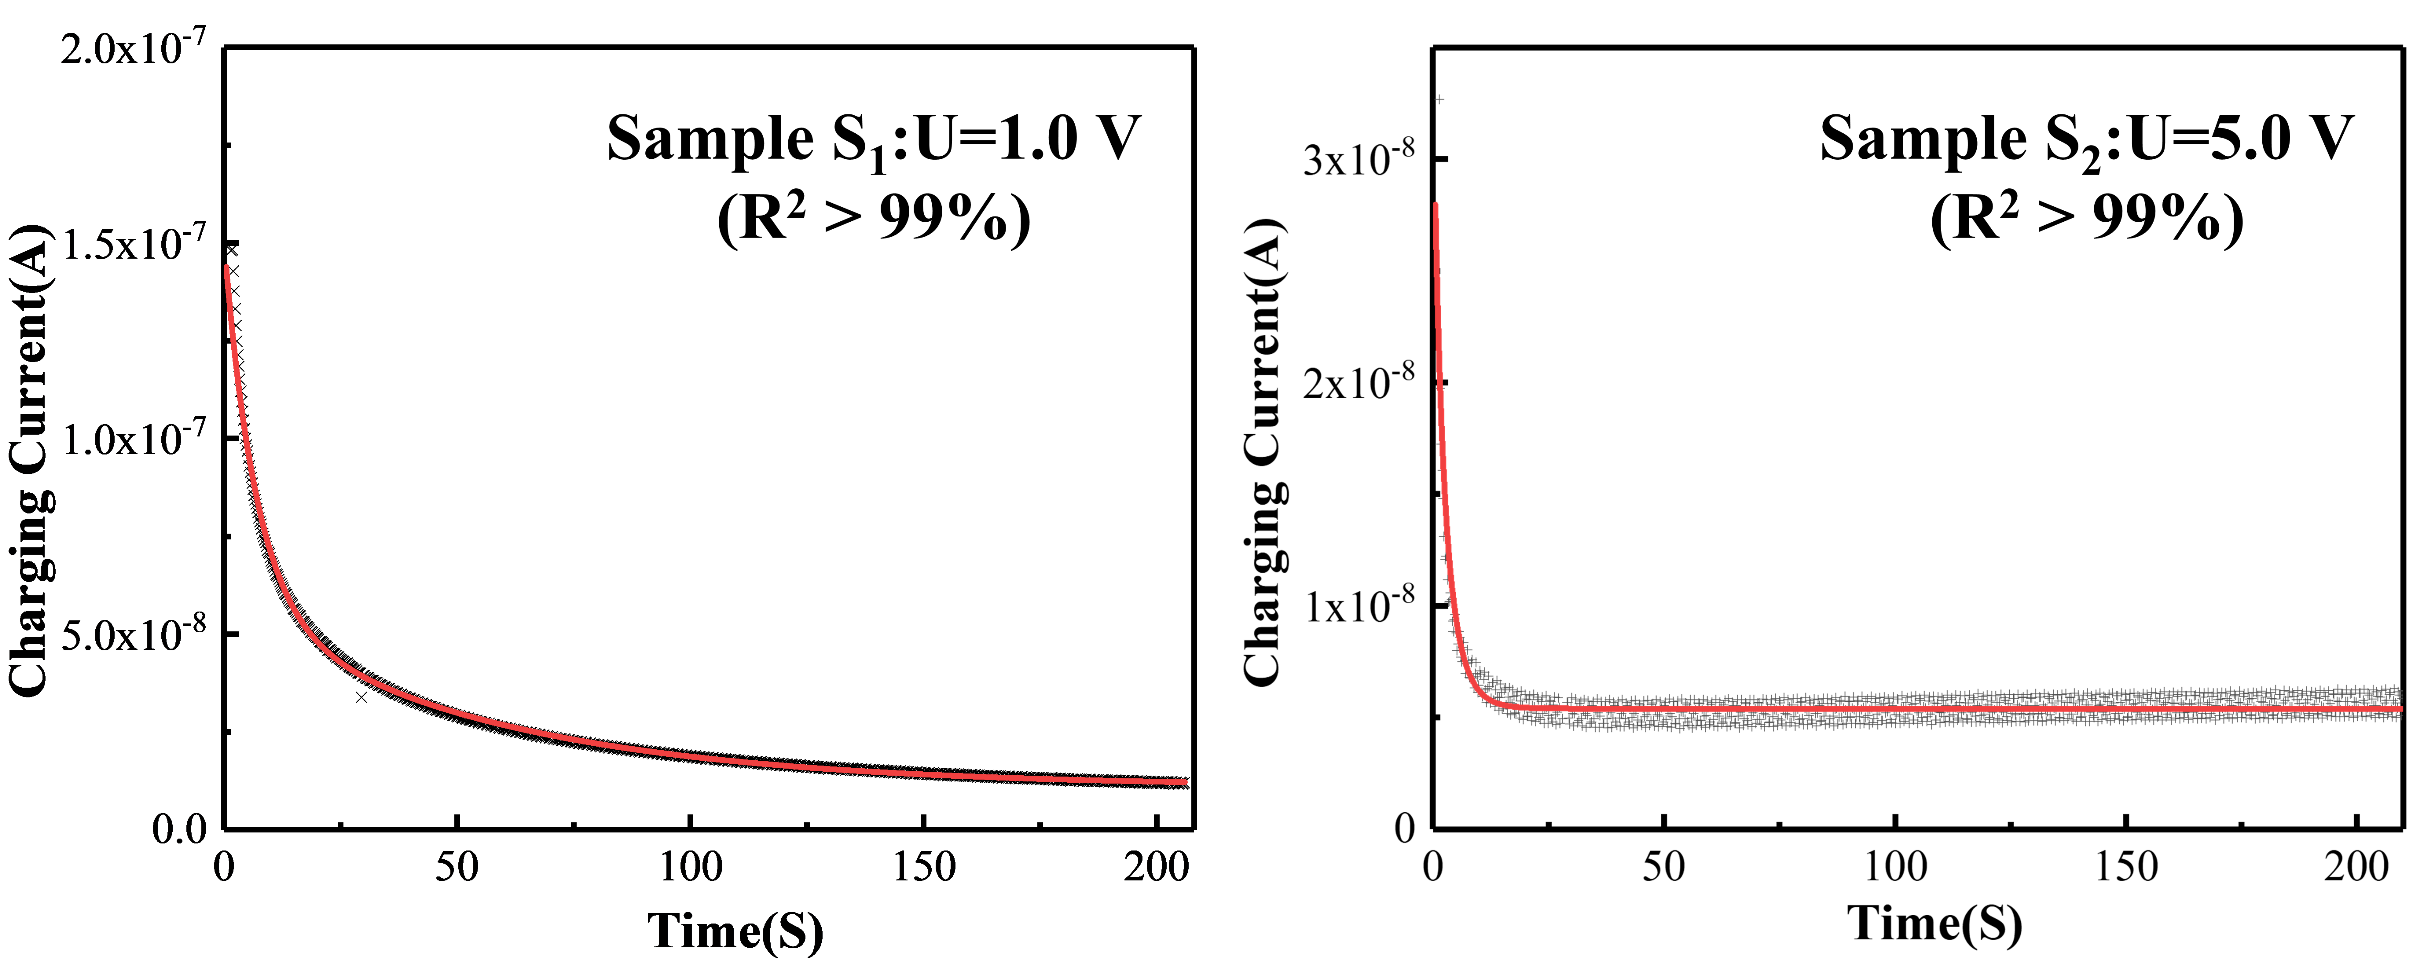


Figure. S6 Experimental dependence of the charging current on the charging time and its double-parameter (red solid curve) fitting (*U* =1.0 V: *I***∞ =**1.1×10-8 A, τ1 = 6.8 s, τ2 = 156 s);


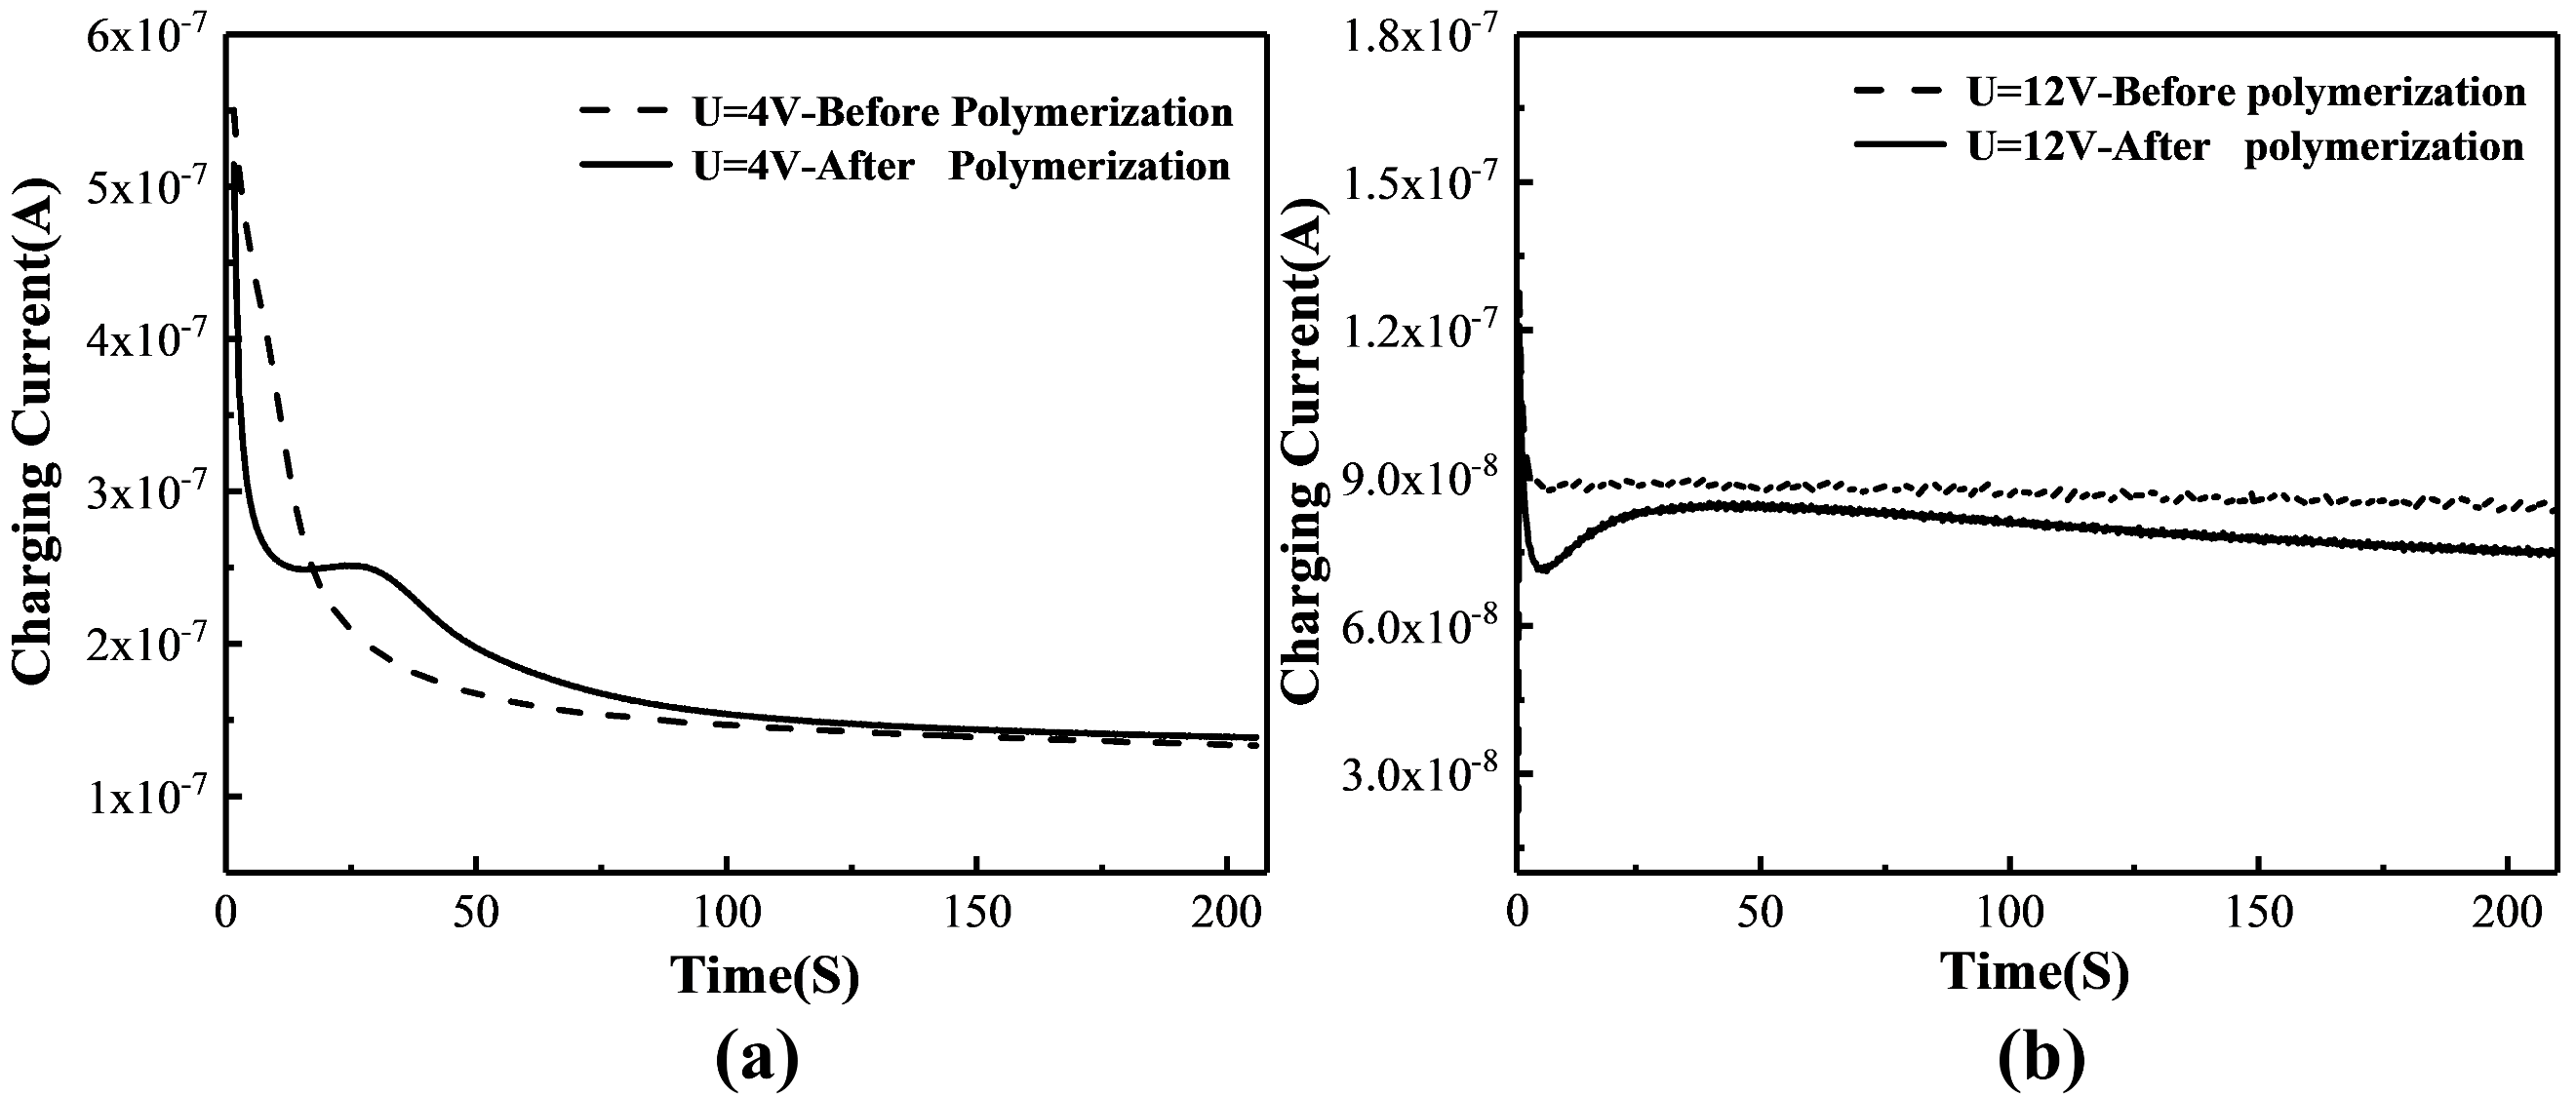


Figure. S7 Comparison of charging current before and after polymerization, (a) of sample **S1**, and (b) of sample **S2**;


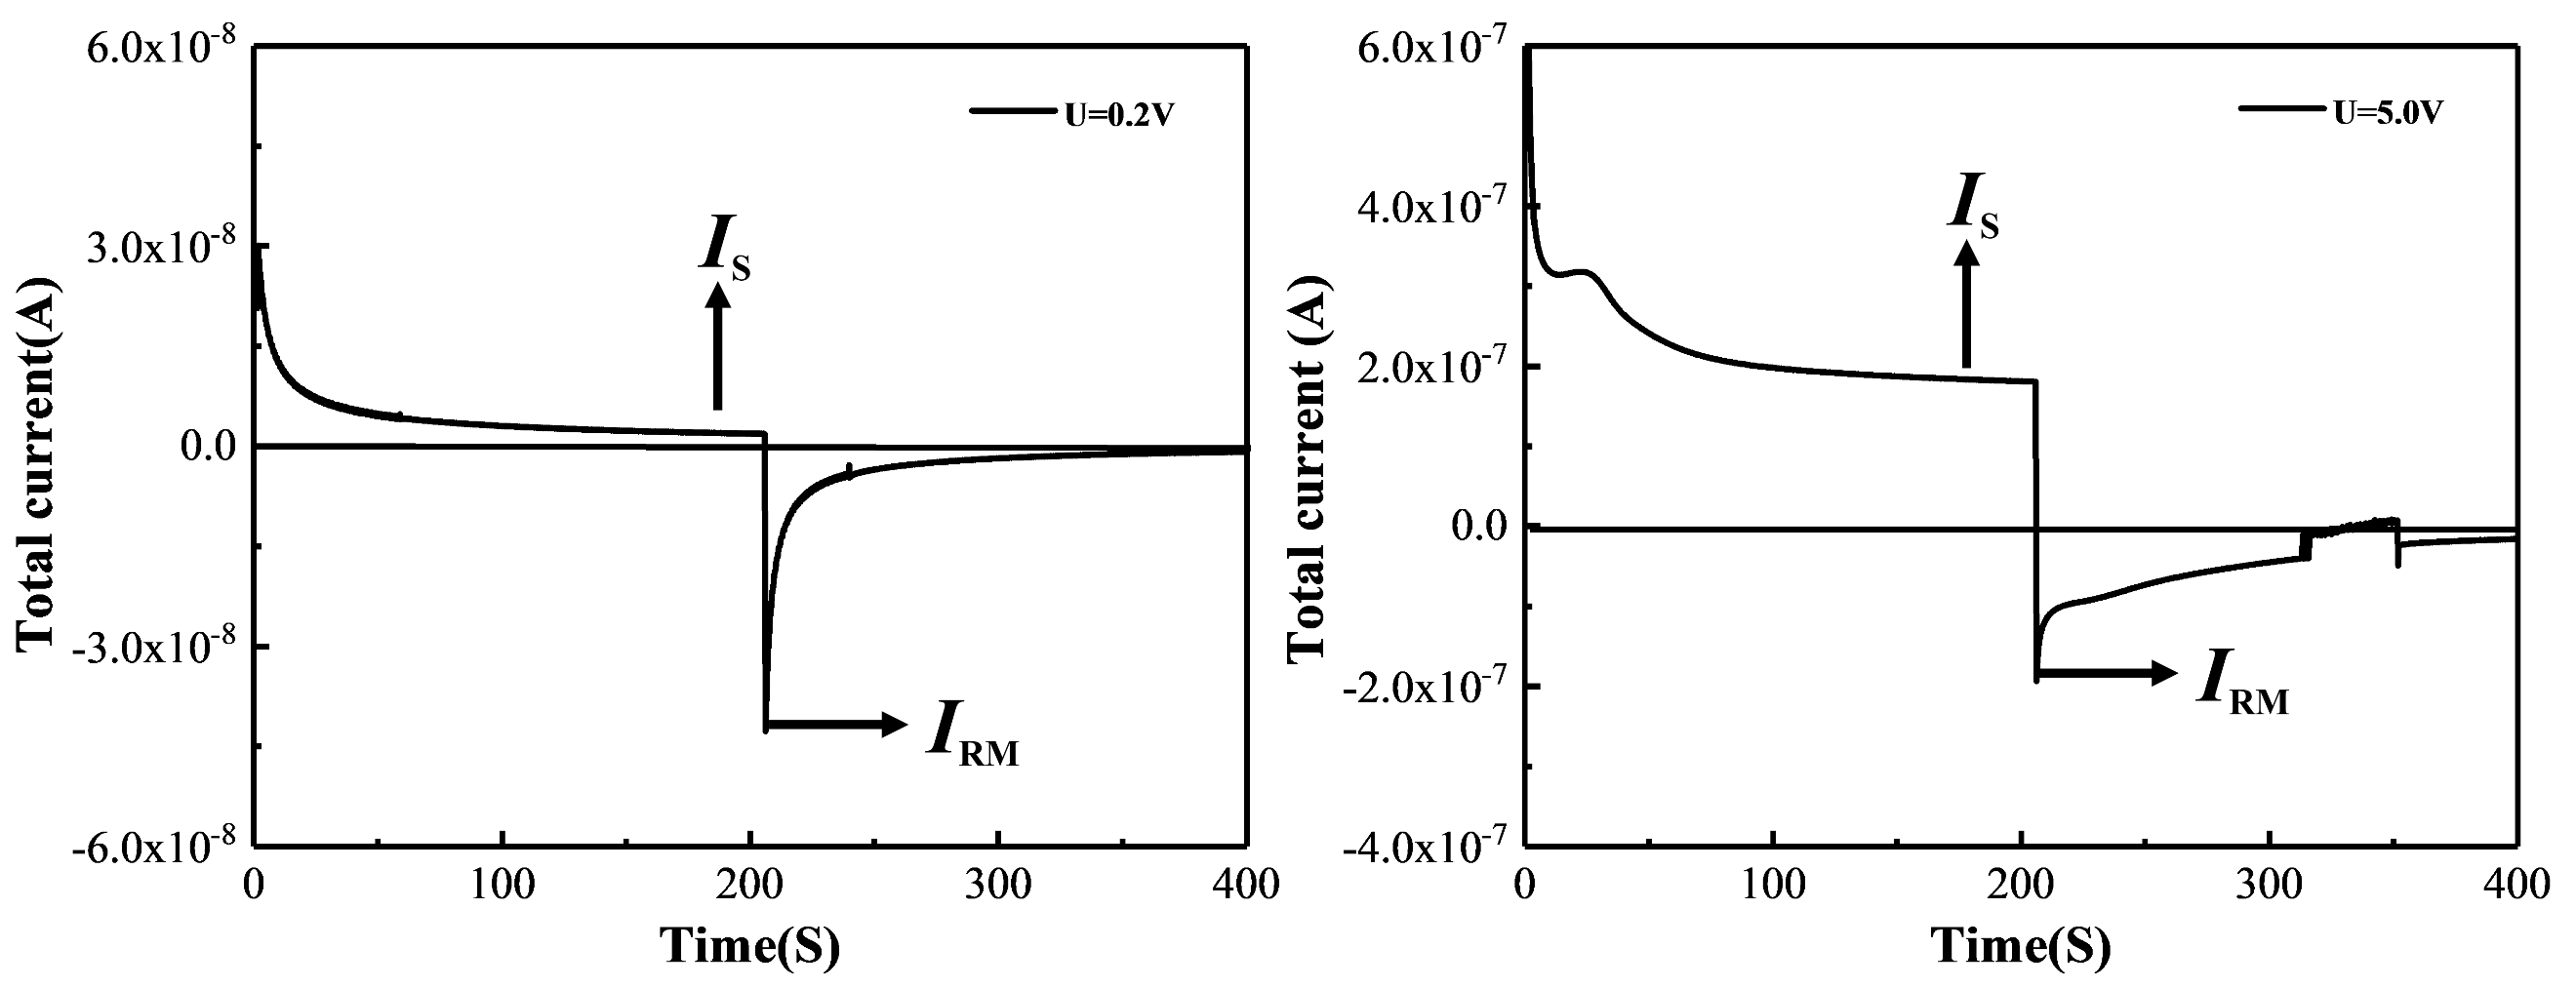


Figure. S8 The total current through sample **S1** at *U* = 0.2 and 5.0 V;
